# Supplementary material
Source: publisher site journal article supplement (https://www.dovepress.com/article/492627)
Supplement: Supplementary file 1 [file get_supplementary_file.php]

# Supplementary materials

|  | **Smoker controls** | **COPD** |
| --- | --- | --- |
| **Subjects (n)** | **4** | **9** |
| **Age (years)** | **57.20±16.08** | **62.33±4.95** |
| **BMI (kg/m2)** | **20.66±2.07** | **19.17±1.62** |
| **Smoking (pack years)** | **80±178.9** | **682.2±847.3** |
| **FEV1 (%predicted)** | **95.40±24.90** | **30.02±10.60***** |
| **FEV1/FVC (%)** | **84.61±9.88** | **45.21±8.48***** |

**Supplementary Table 1. Baseline patient characteristics. Abbreviations:** FEV1: forced expiratory volume in 1 second; FVC: forced vital capacity; BMI: body mass index. Data is shown as mean±SD, ***p＜0.001 compared with smoker controls.

**
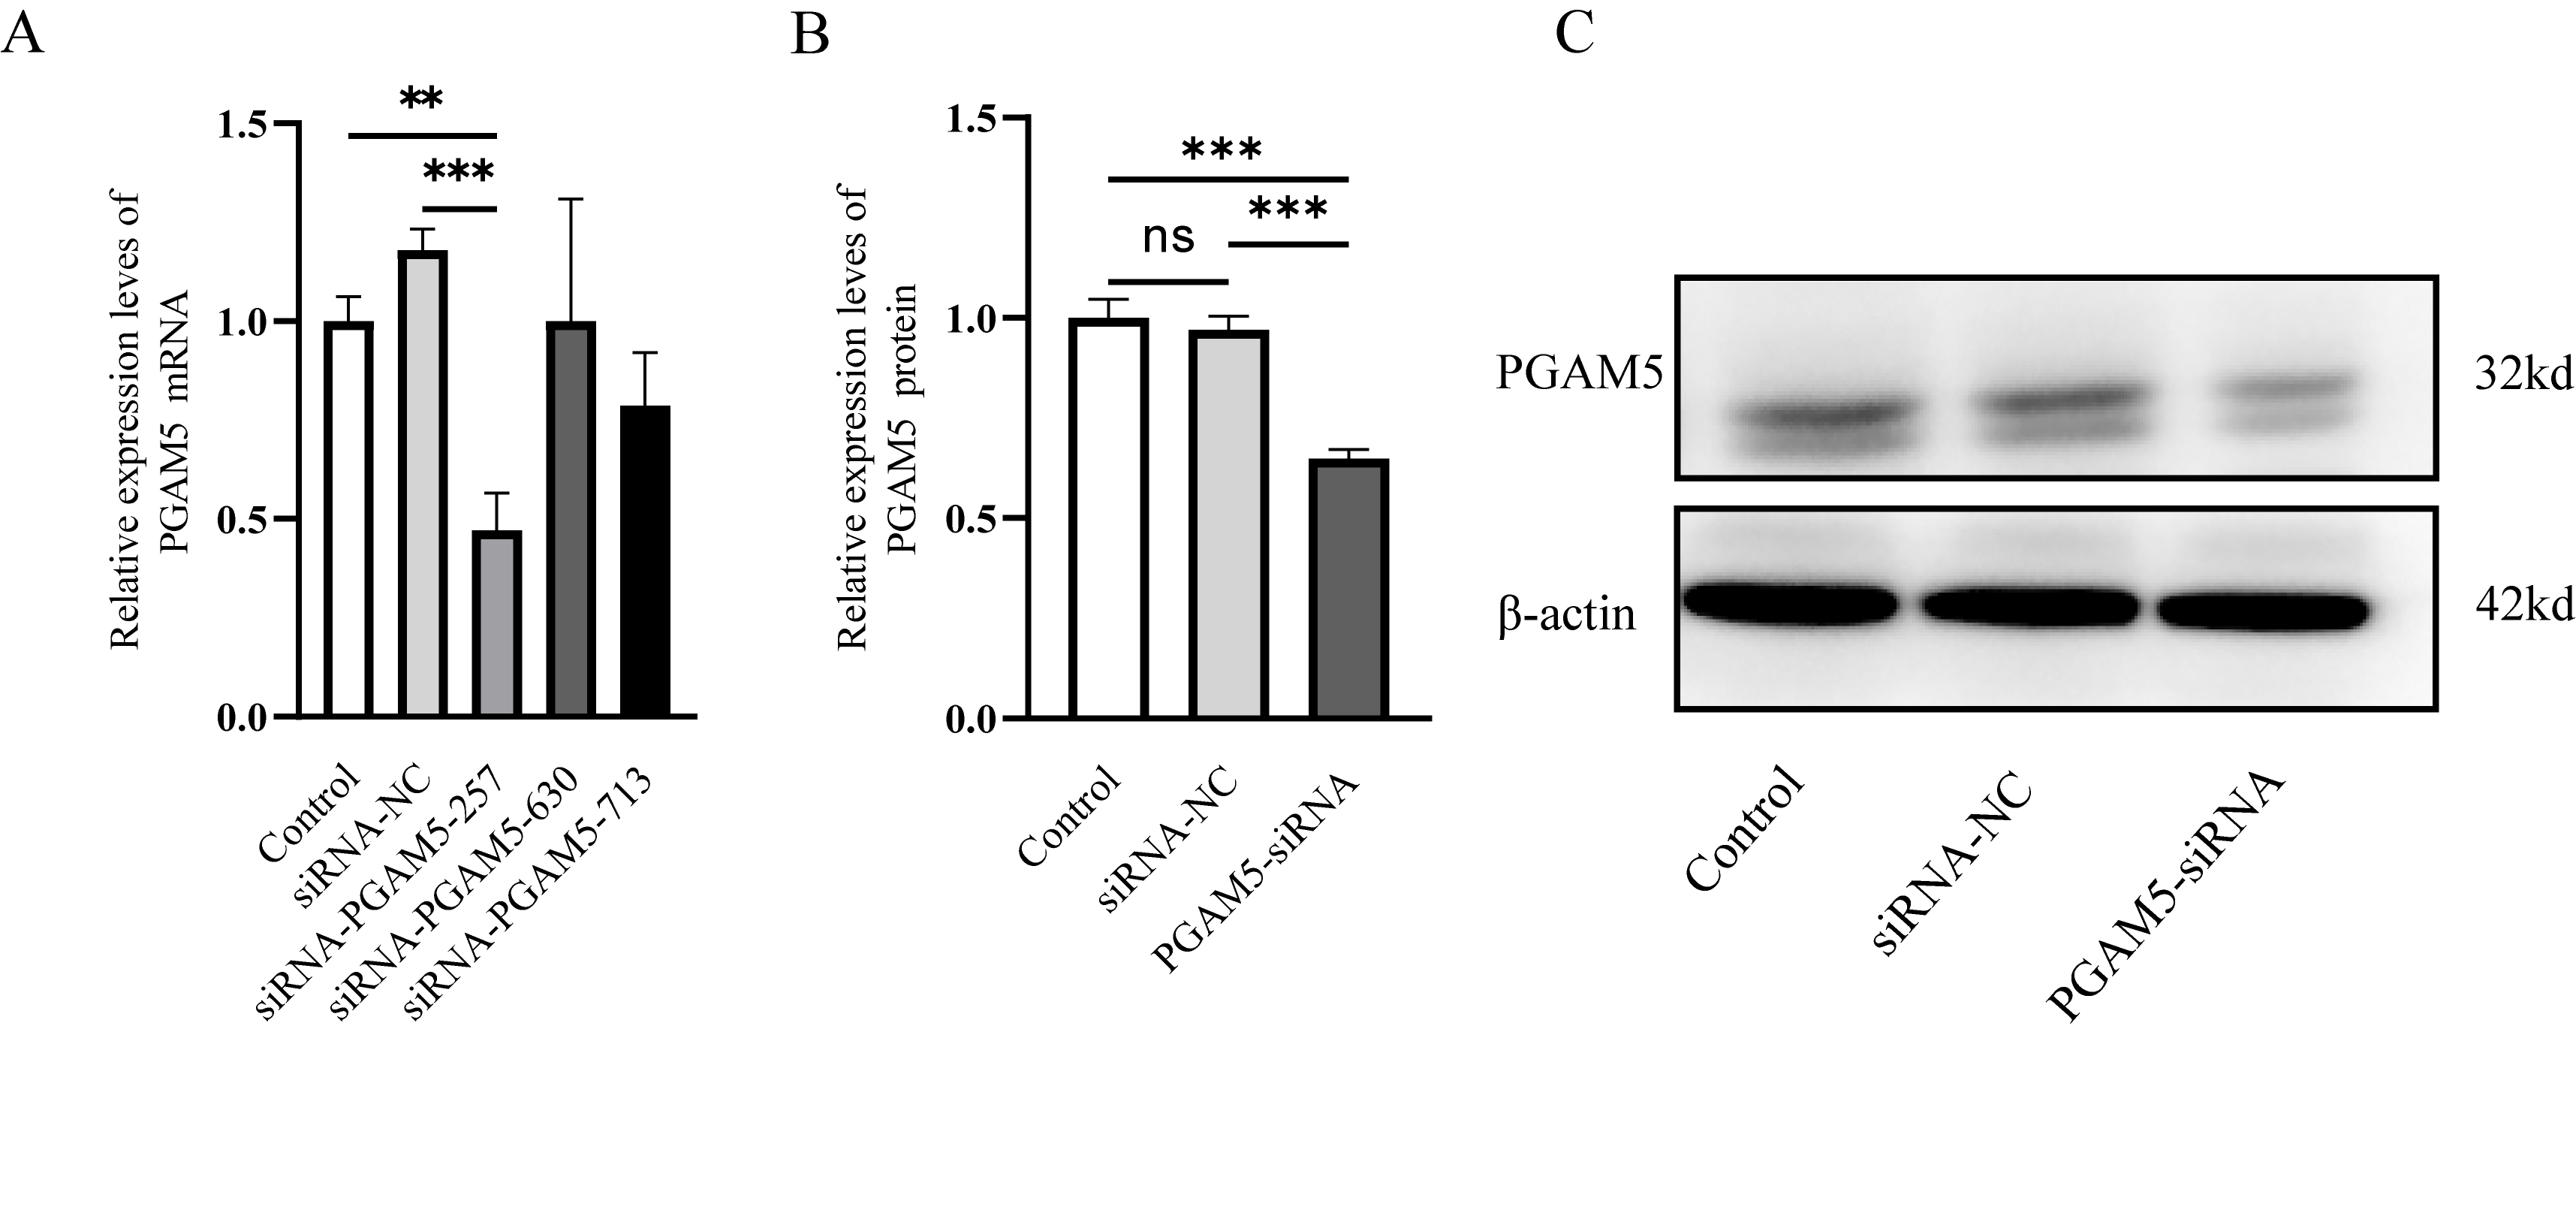
**

**Supplementary Figure 1 Transfection efficiency of siRNA-PGAM5.** (A) PGAM5 expression levels in murine alveolar macrophages transfected with siRNA-NC, siRNA-PGAM5-257, siRNA-PGAM5-630, or siRNA-PGAM5-713 were quantified using reverse transcription-quantitative PCR. (B and C) PGAM5 protein expression expression levels after siRNA-PGAM5-257 transfection, as analyzed by western blotting. Each experiment was repeated at least three times independently, and the experimental data were expressed as mean± standard deviation. ( **P < 0.01, ***P < 0.001).

**
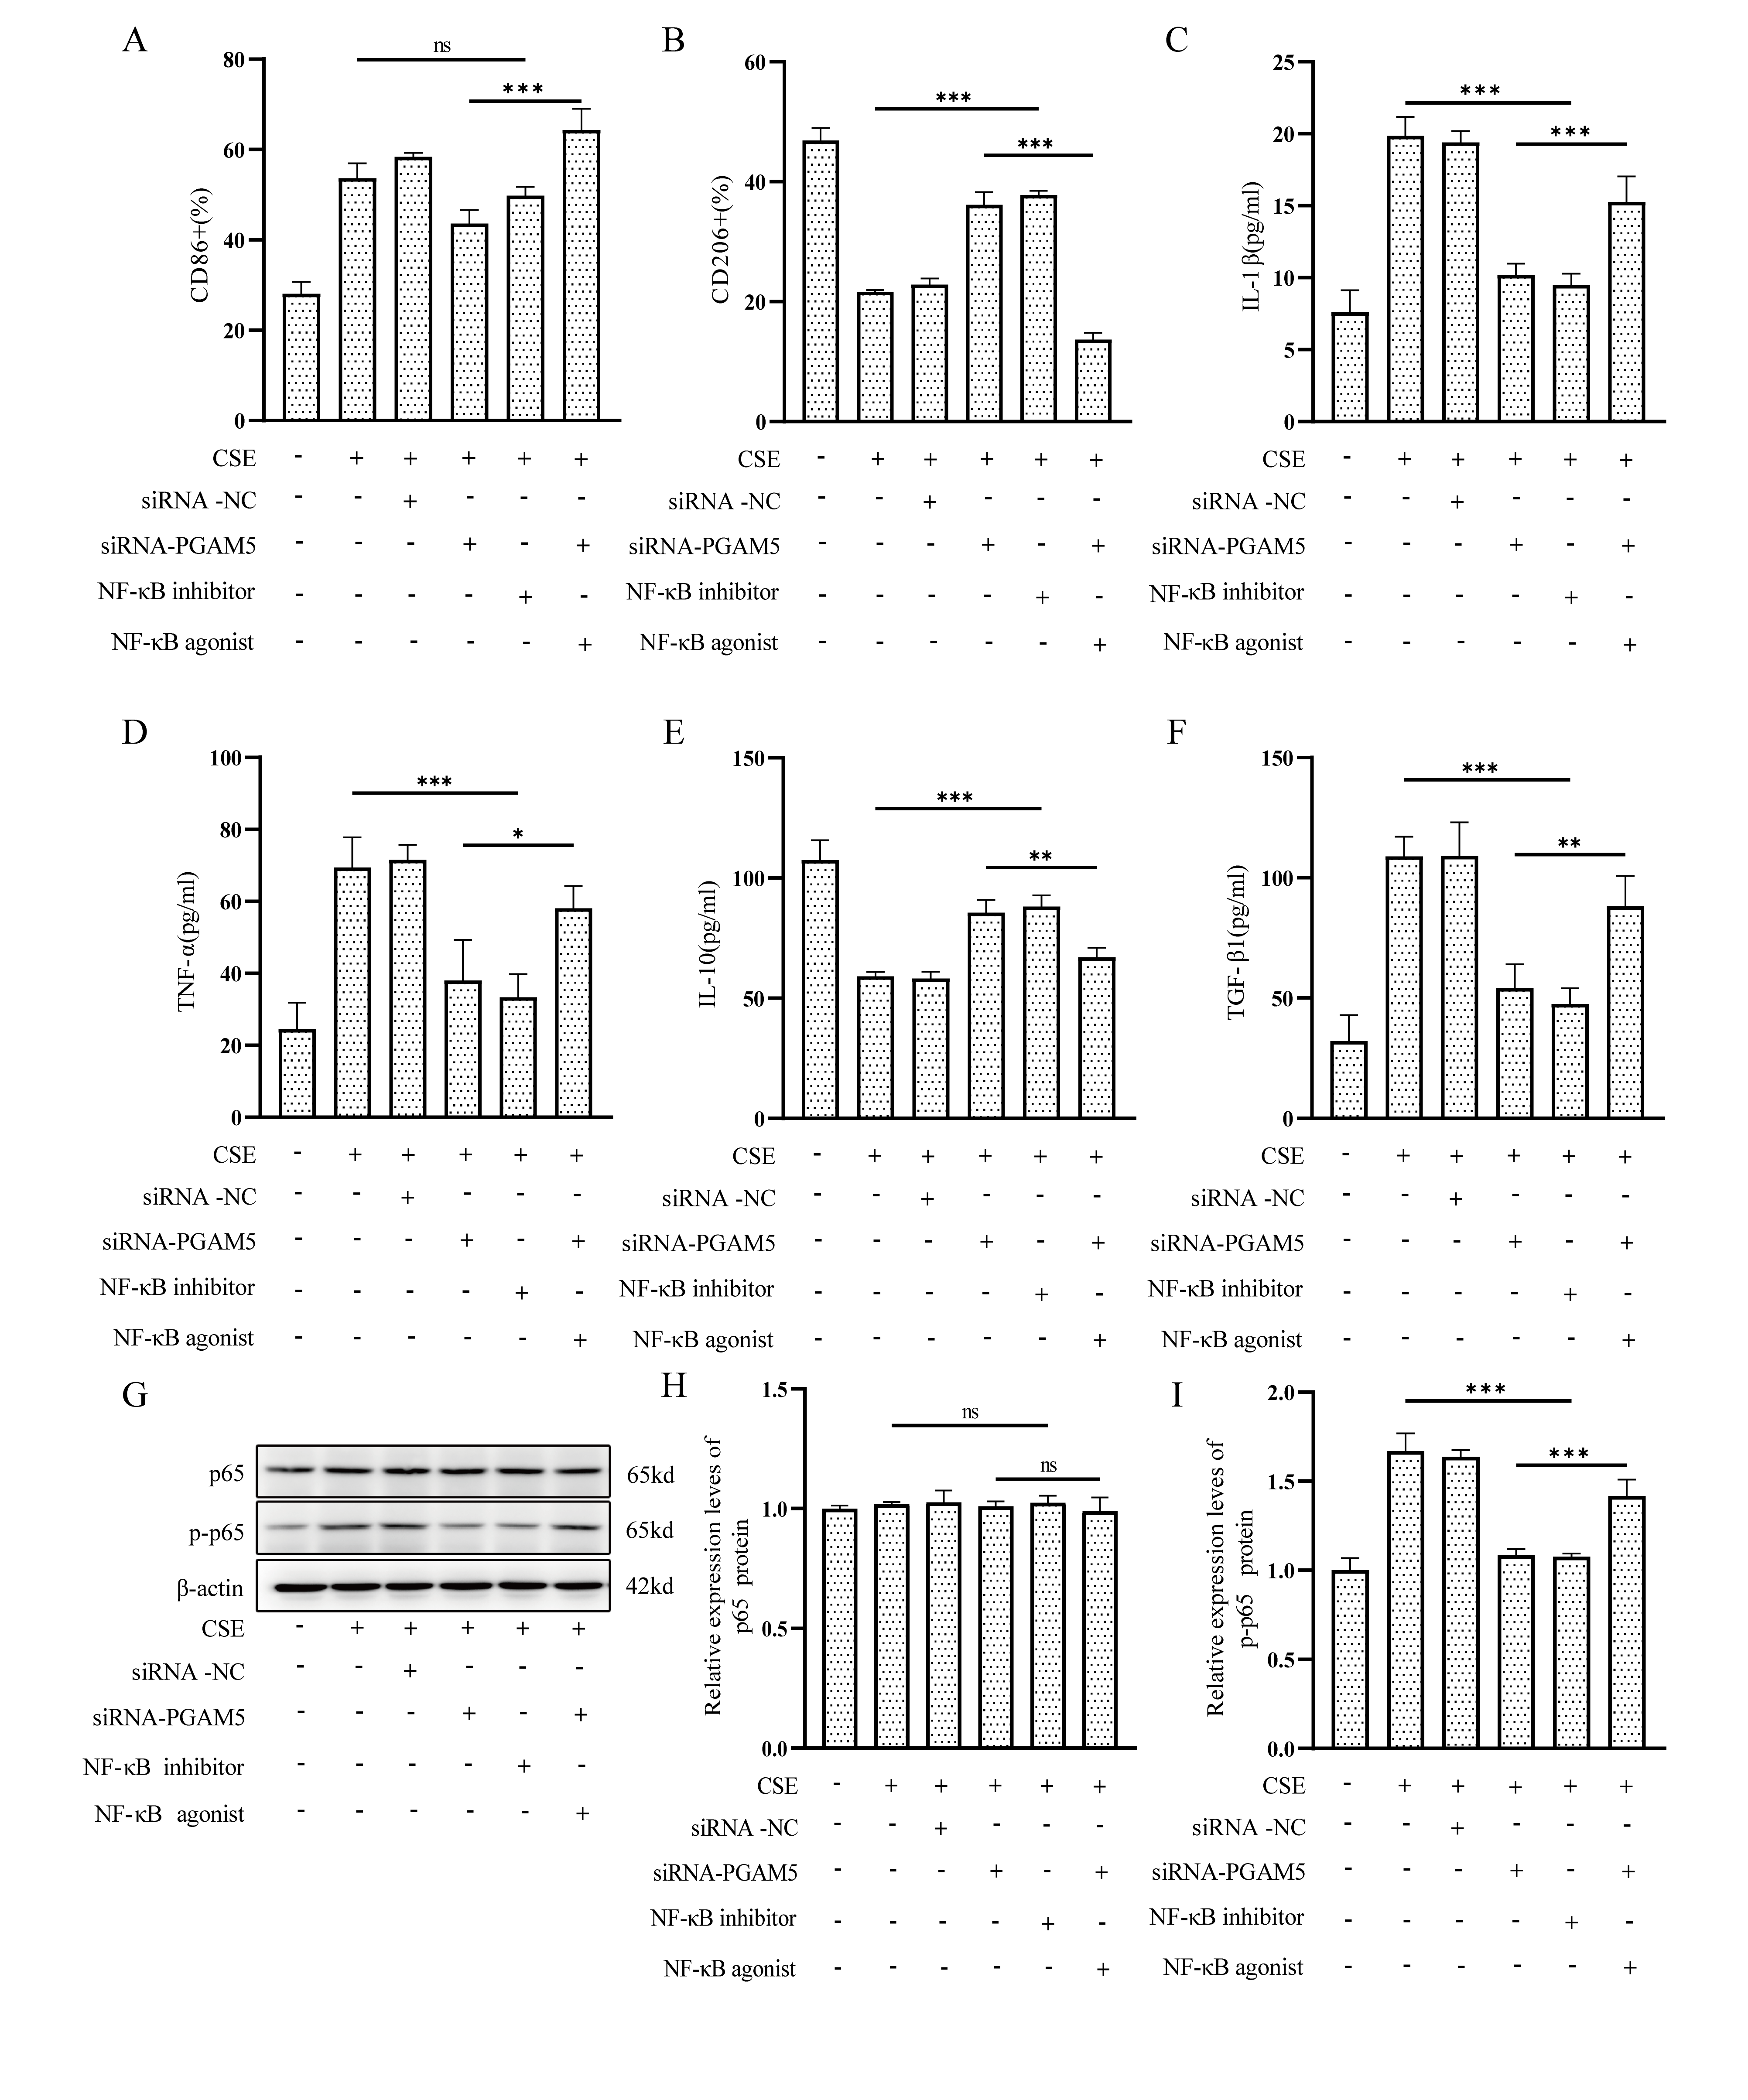
**

**Supplementary Figure 2 Rescue experiments.** (A-B) Use flow cytometry to detect macrophage markers and understand macrophage polarization. (C-F) IL-1β, TNF-α, IL-10, and TGF-β1 expression levels. (G) Western blot results of the NF-κB pathway. (H-I) Quantitative analysis of western blot of the rescue experiments. Each experiment was repeated at least three times independently, and the experimental data were expressed as mean standard deviation, and the experimental data were expressed as mean± standard deviation.( *P＜0.05, **P < 0.01, ***P < 0.001).
